# Supplementary material for: E3 ubiquitin ligase ASB17 is required for spermiation in mice
Source: PubMed Central journal article supplement — Transl Androl Urol. 2021 Dec;10(12):4320–32. doi: 10.21037/tau-21-789 (PMC8749070; doi:10.21037/tau-21-789), 2021-12
Supplement: tau-10-12-4320-supplementary.pdf [file tau-10-12-4320-supplementary.pdf]

## Supplementary

**Table S1** Antibodies used in the study

| Antigen     | Source | Company    | Application | Dilution       | Label           | RRID        |
|-------------|--------|------------|-------------|----------------|-----------------|-------------|
| ASB17       | Rabbit | Aviva      | IF          | 1:1,000        | ES junction     | AB_10713532 |
| ESPN        | Mouse  | BD         | IF; IP      | 1:200; 5 µg/IP | ES junction     | AB_399174   |
| Tubulin     | Rabbit | Abcam      | WB          | 1:10,000       | Loading control | AB_2210403  |
| His         | Rabbit | Abcam      | WB          | 1:1,000        | Tag             | AB_443105   |
| Ubiquitin   | Mouse  | Santa Cruz | WB          | 1:1,000        | Ubiquitin chain | AB_628423   |
| PNA         | –      | Vector     | IF          | 1:50           | Acrosome        | AB_2336642  |
| Phalloidins | –      | Thermo     | IF          | 1:200          | F-actin         | AB_2632953  |

Asb17, ankyrin repeat and SOCS box protein 17; ESPN, Espin; PNA, Peanut agglutinin.

**Table S2** Top10 binding residues

| Class | Residue_ID | Binding free energy (kcal/mol) (total –48.85) |
|-------|------------|-----------------------------------------------|
| ESPN  | HIE-304    | –6.58                                         |
| ESPN  | TRP-272    | –3.48                                         |
| ESPN  | THR-330    | –2.53                                         |
| ESPN  | LEU-271    | –2.12                                         |
| ESPN  | ASP-303    | –1.65                                         |
| ESPN  | GLN-329    | –1.20                                         |
| ESPN  | ASP-311    | –1.06                                         |
| ESPN  | ARG-326    | –1.05                                         |
| ESPN  | GLY-306    | –0.79                                         |
| ESPN  | TYR-307    | –0.64                                         |
| ASB17 | ARG-234    | –4.02                                         |
| ASB17 | ARG-125    | –3.44                                         |
| ASB17 | LEU-145    | –3.38                                         |
| ASB17 | LEU-87     | –2.31                                         |
| ASB17 | ARG-134    | –2.23                                         |
| ASB17 | ASN-180    | –2.11                                         |
| ASB17 | LEU-183    | –2.10                                         |
| ASB17 | SER-146    | –2.07                                         |
| ASB17 | GLY-147    | –1.96                                         |
| ASB17 | LEU-152    | –1.70                                         |

Asb17, ankyrin repeat and SOCS box protein 17; ESPN, Espin.

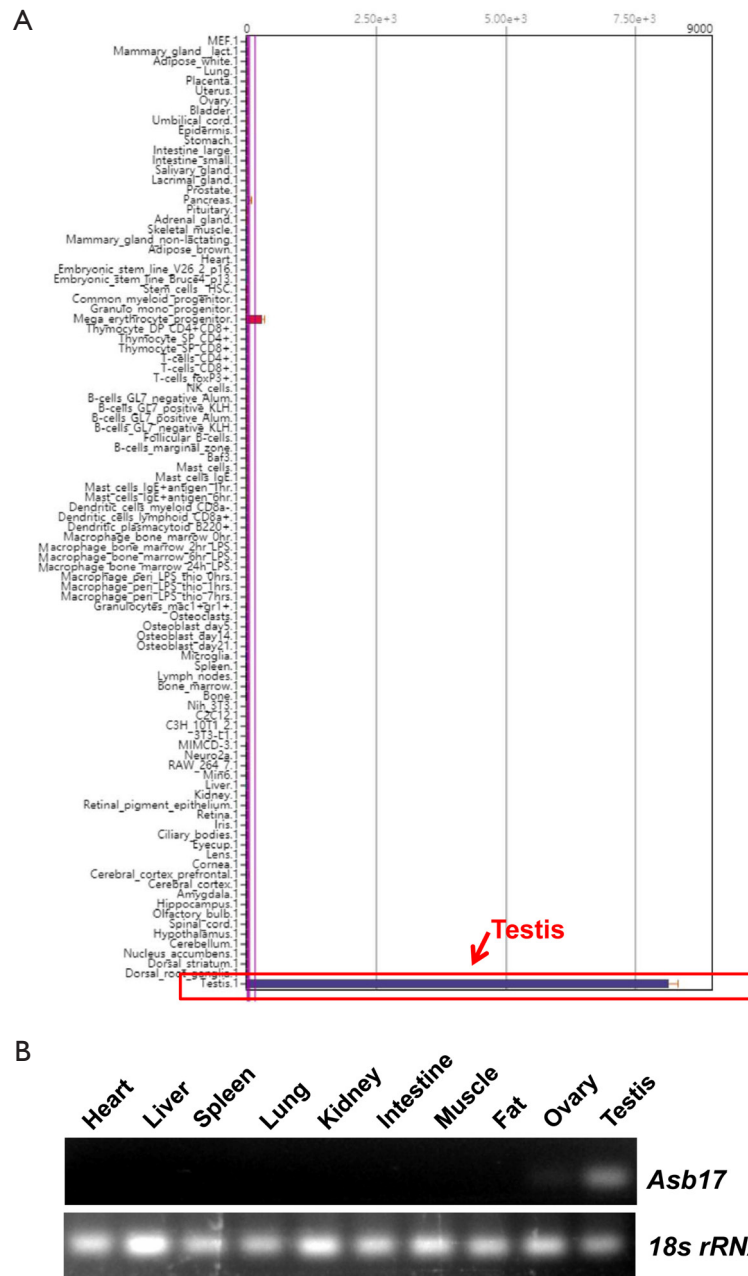

**Figure S1** Expression profiling of *Asb17* in mice. (A) Bioinformatic analysis of *Asb17* expression in multiple tissues and cells of mice. The data are acquired from the BioGPS database based on microarray analysis (<http://biogps.org/>). (B) RT-PCR analysis of *Asb17* in multiple murine tissues. *Asb17*, ankyrin repeat and SOCS box protein 17.

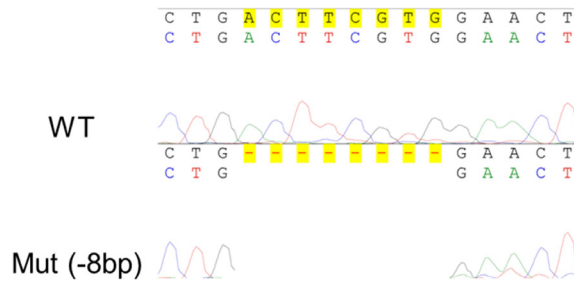

**Figure S2** Sanger sequencing of Asb17 gene. Asb17, ankyrin repeat and SOCS box protein 17.

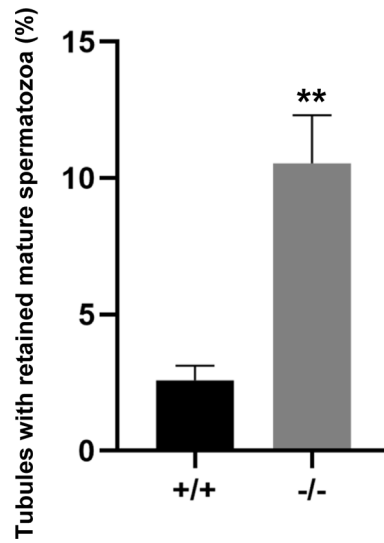

**Figure S3** Quantification of tubules with “retained mature spermatozoa”. \*\*P<0.01.
